# Supplementary material for: Genetics of Marbling in Wagyu Revealed by the Melting Temperature of Intramuscular and Subcutaneous Lipids
Source: Hindawi journal article supplement (doi:10.1155/2017/3948408), 2017-01-01
Supplement: f1 [file 3948408.f1.pdf]

369

**Tables**370 **Supplemental Table S1: Cohort summary**

|                 | <b>Tm</b> |           | <b>MS</b> |       | <b>No. Sire 1</b> | <b>No. Sire 2</b> | <b>No. Sire 3</b> | <b>Total N</b> |
|-----------------|-----------|-----------|-----------|-------|-------------------|-------------------|-------------------|----------------|
|                 | Average   | Range     | Average   | Range |                   |                   |                   |                |
| <b>Cohort 1</b> | 37.1      | 32.1-41.0 | 7.1       | 2-11  | 10                | 8                 | 8                 | 64             |
| <b>Cohort 2</b> | 37.1      | 32.7-40.5 | 7.9       | 5-11  | 5                 | 3                 | 11                | 62             |
| <b>Total</b>    | 37.1      | 32.1-41.0 | 7.5       | 2-11  | 15                | 11                | 19                | 126            |

371
